# Supplementary material for: Treadmill running and targeted tibial loading differentially improve bone mass in mice
Source: PubMed Central journal article supplement — Bone Rep. 2019 Jan 17;10:100195. doi: 10.1016/j.bonr.2019.100195 (PMC6348199; doi:10.1016/j.bonr.2019.100195), 2019-01-17
Supplement: mmc1.pdf [file mmc1.pdf]

## **Multiple files are bound together in this PDF Package.**

Adobe recommends using Adobe Reader or Adobe Acrobat version 8 or later to work with documents contained within a PDF Package. By updating to the latest version, you'll enjoy the following benefits:

- Efficient, integrated PDF viewing
- Easy printing
- Quick searches

**Don't have the latest version of Adobe Reader?**

**[Click here to download the latest version of Adobe Reader](#)**

**If you already have Adobe Reader 8,  
click a file in this PDF Package to view it.**
